# Supplementary material
Source: MDPI journal article supplement (https://www.mdpi.com/2073-4344/10/6/611)
Supplement: s1 [file s1]

## Supplementary materials

**Figure S1.** Color removal during subsequent catalytic ozonation cycles using the same AC (0.5 g/L); RB5 model solution (0.5g/L); reaction time 30 min.

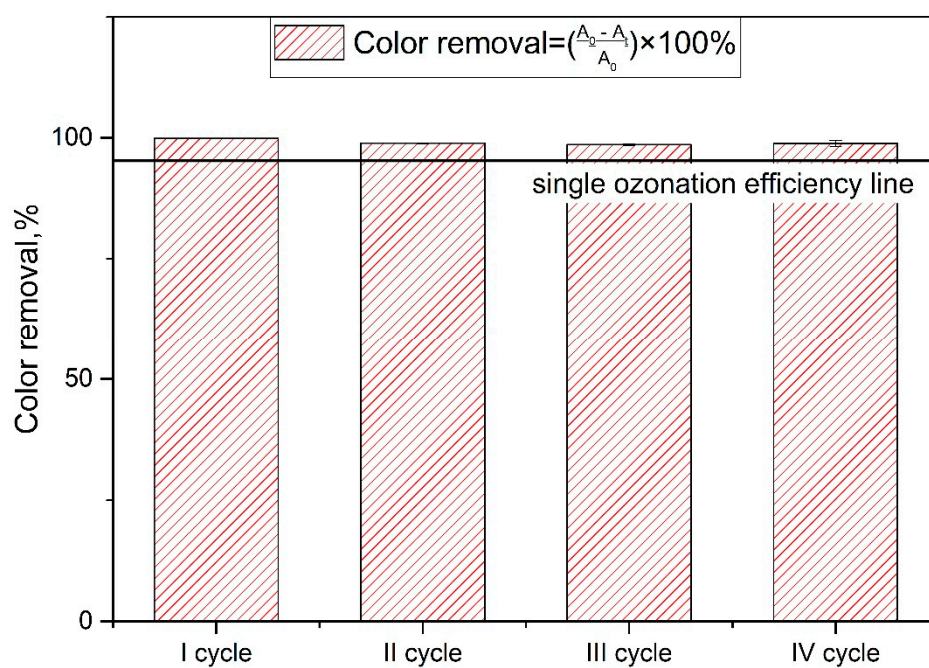

Figure S1.
